# Supplementary material for: Architecture, Chromatin and Gene Organization of Toxoplasma gondii Subtelomeres
Source: MDPI journal article supplement (doi:10.3390/epigenomes6030029), 2022-09-15
Supplement: s1 [file s1]

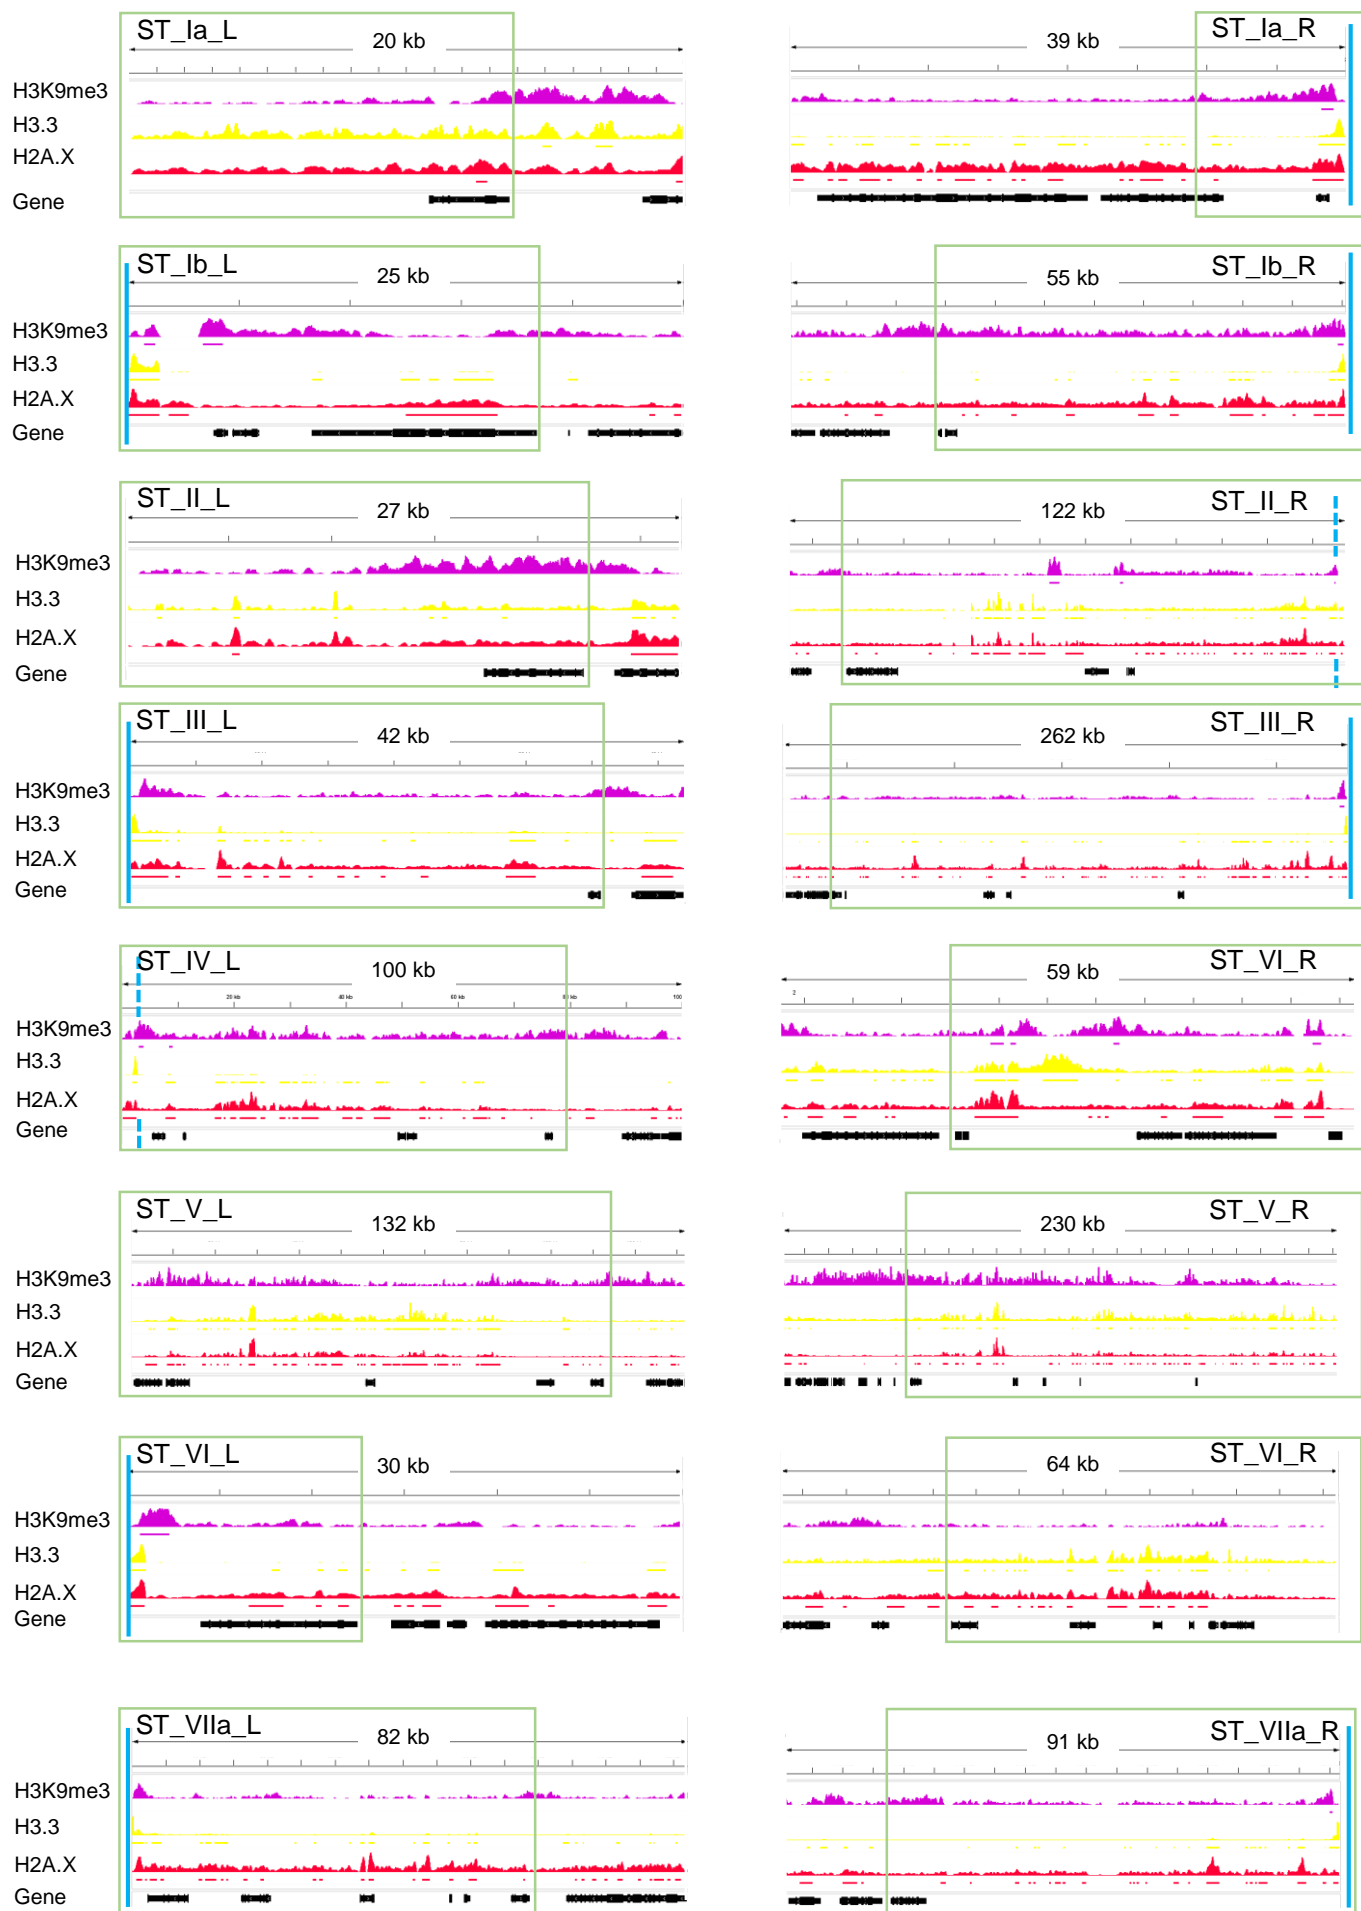

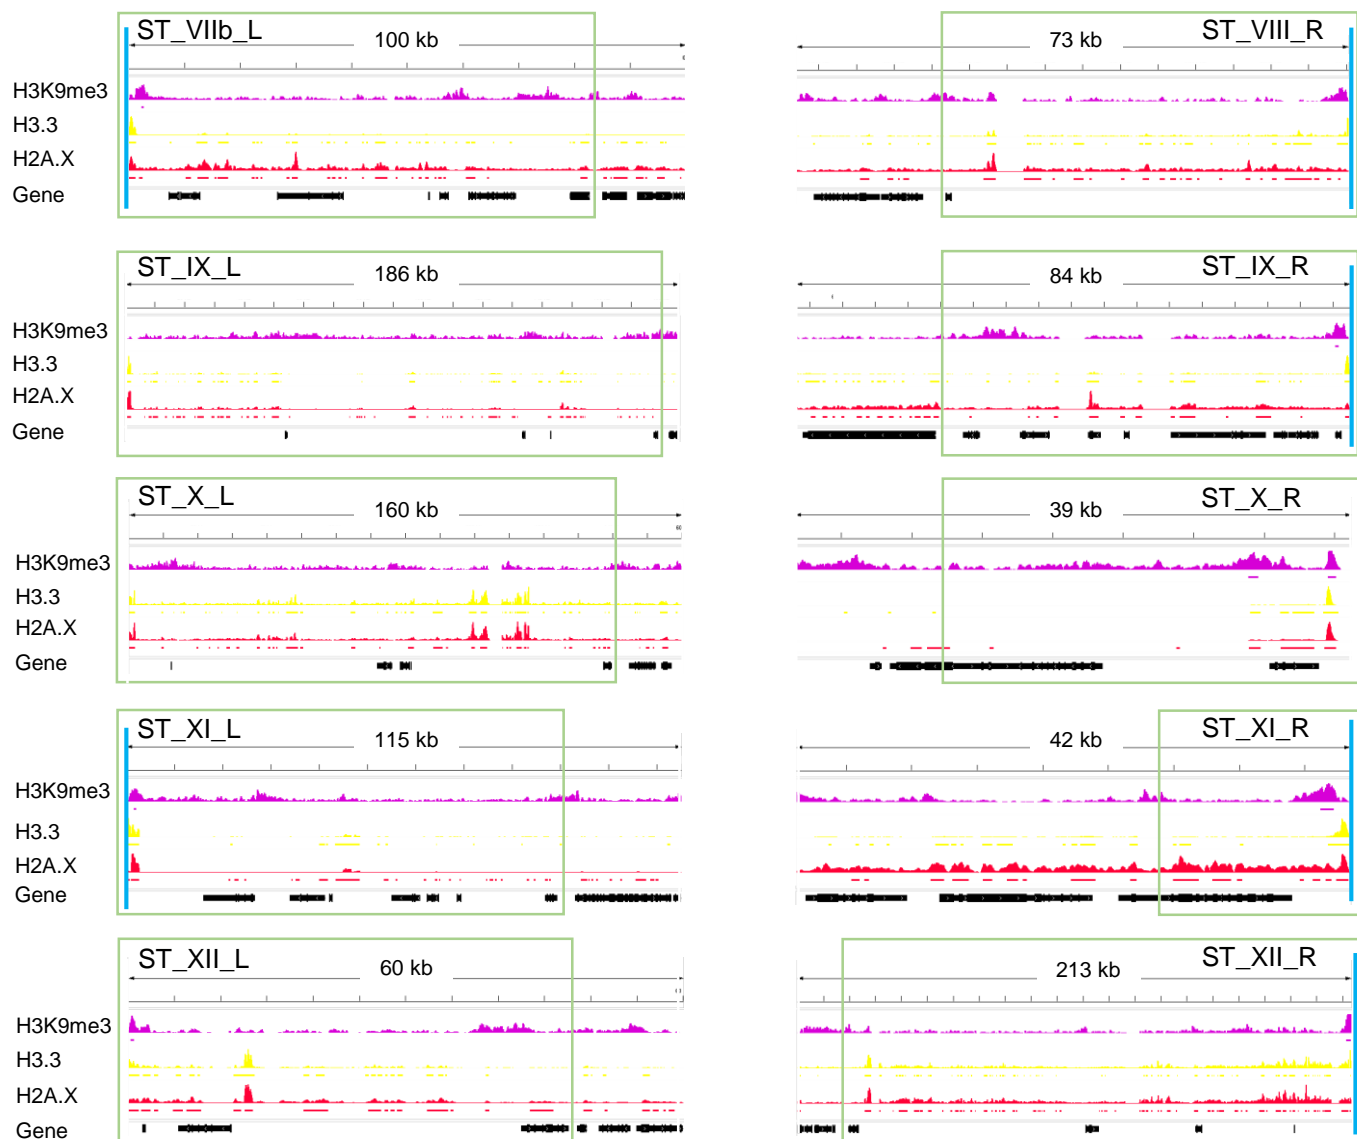

Figure S1

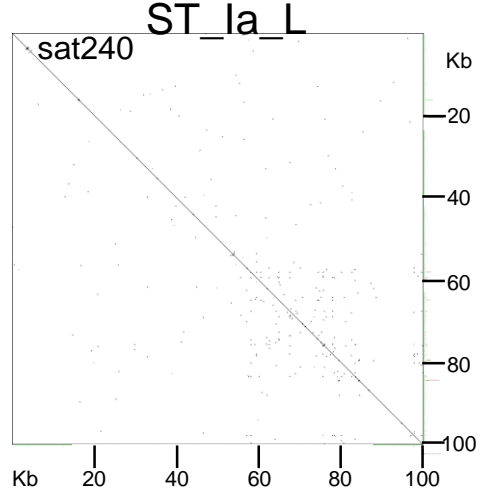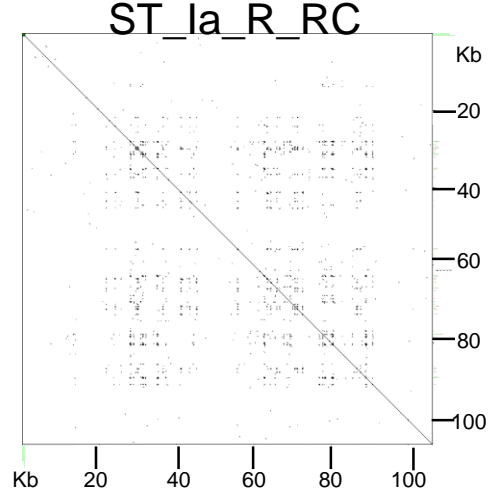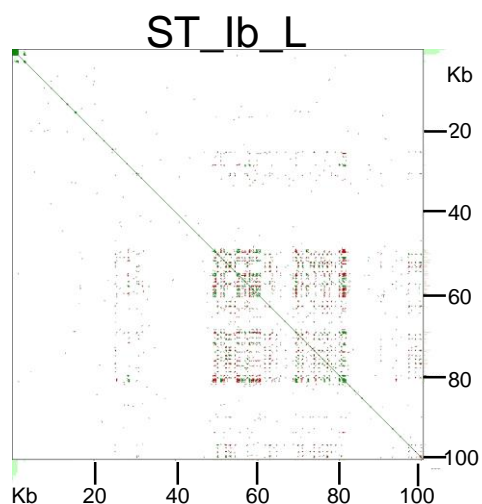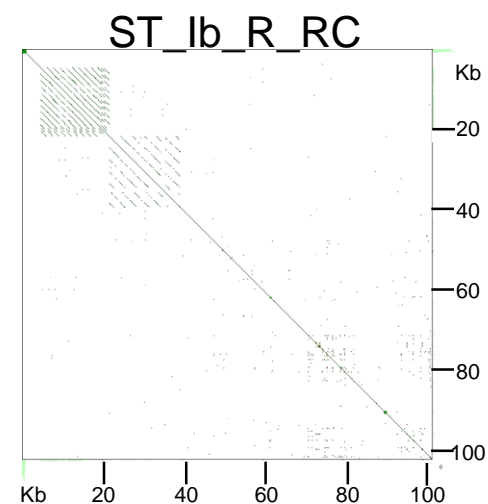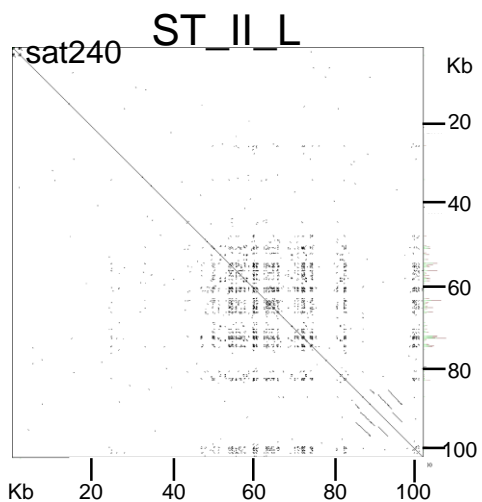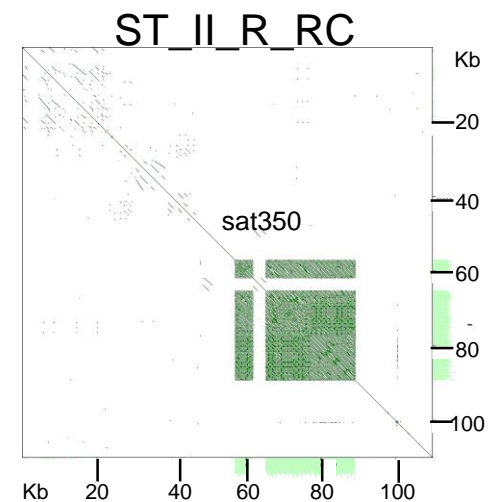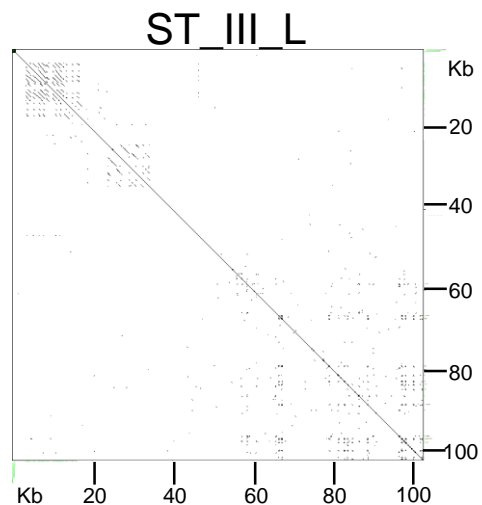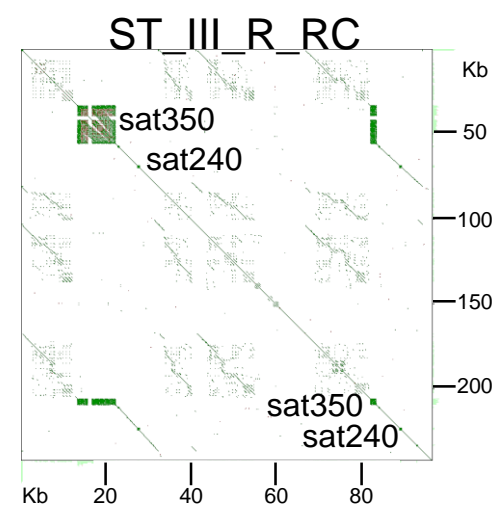

ST\_IV\_L

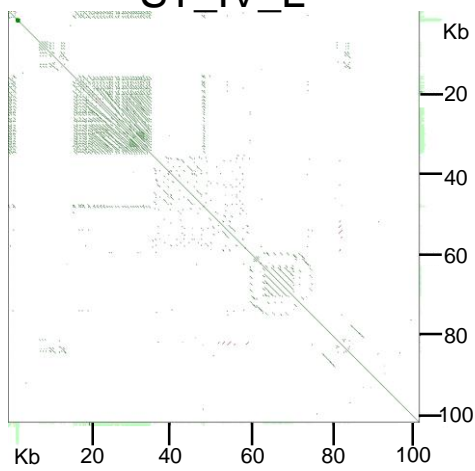

ST\_IV\_R\_RC

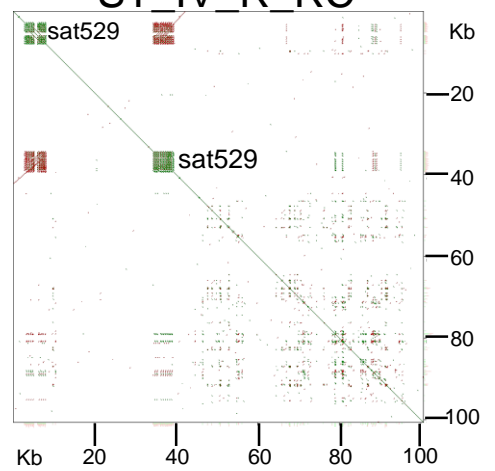

ST\_V\_L

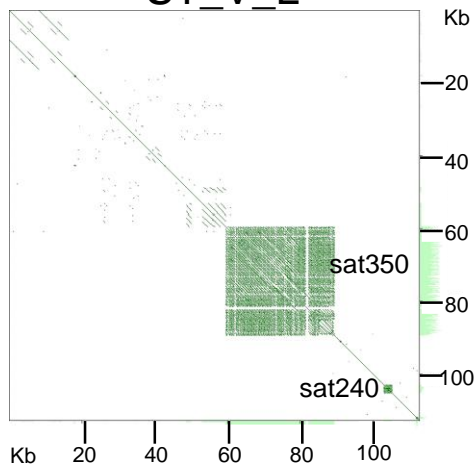

ST\_V\_R\_RC

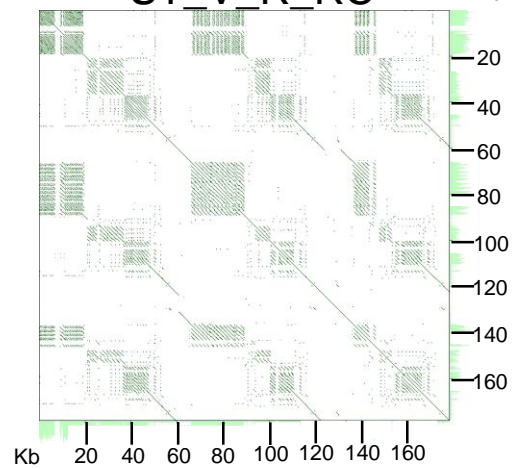

ST\_VI\_L

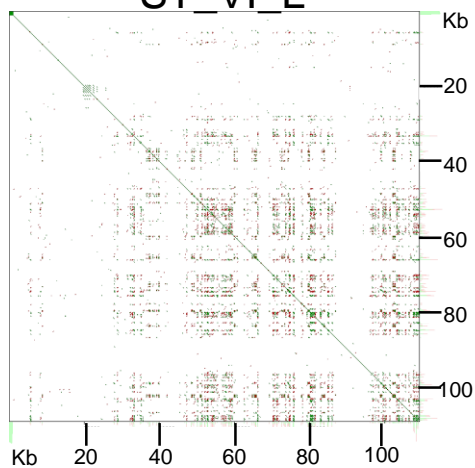

ST\_VI\_R\_RC

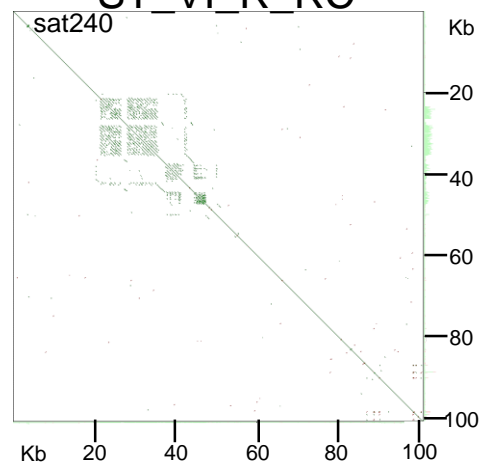

ST\_VIIa\_L

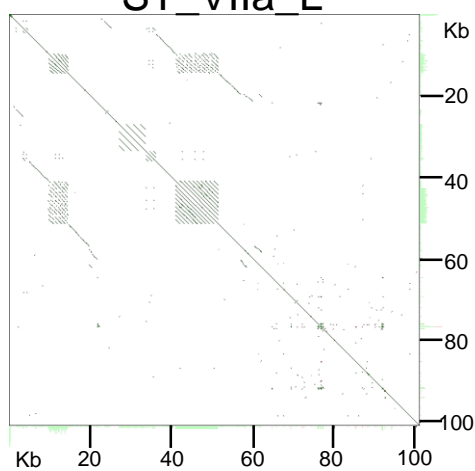

ST\_VIIa\_R\_RC

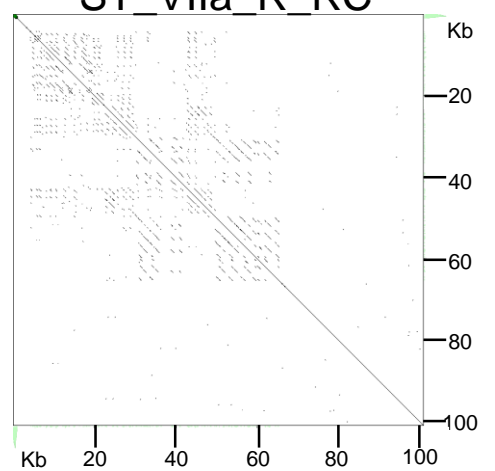

ST\_VIIb\_L

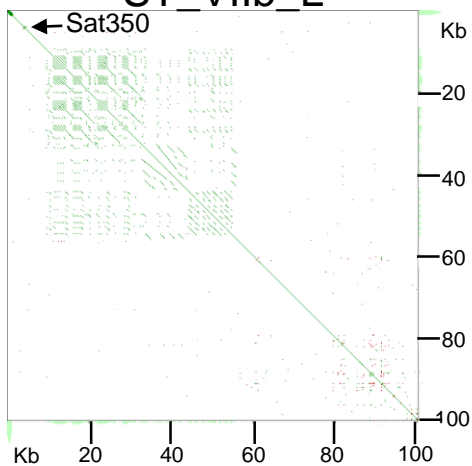

ST\_VIII\_R\_RC

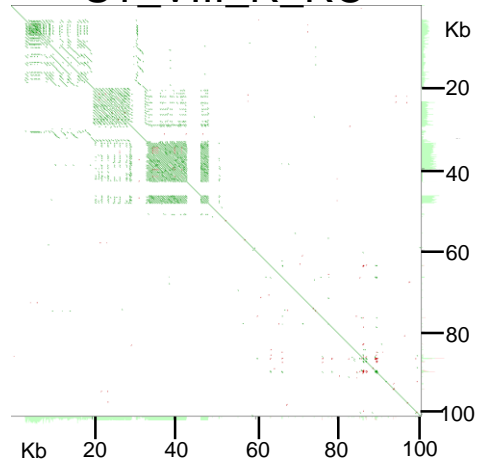

ST\_IX\_L

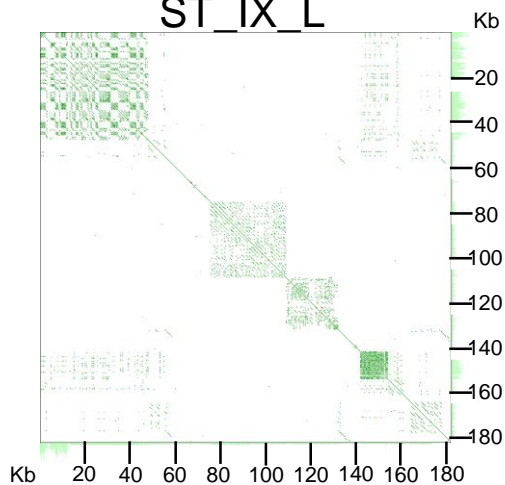

ST\_IX\_R\_RC

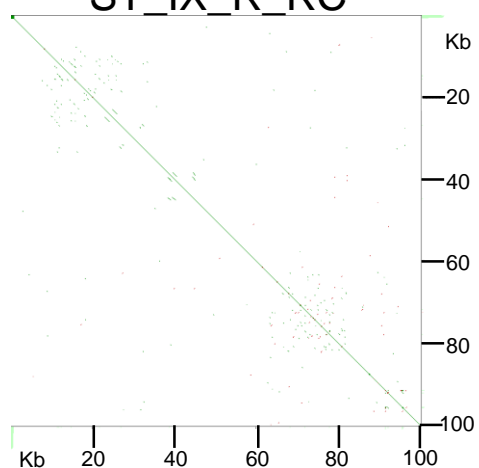

ST\_X\_L

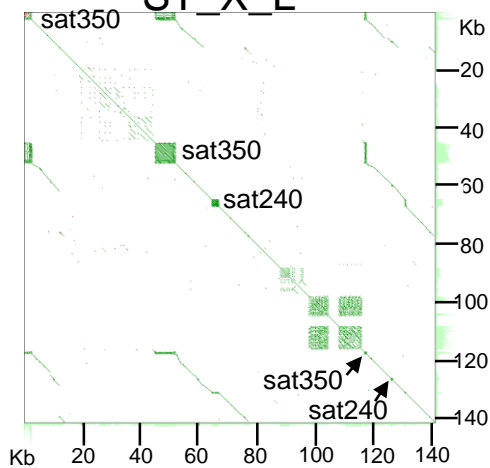

ST\_X\_R\_RC

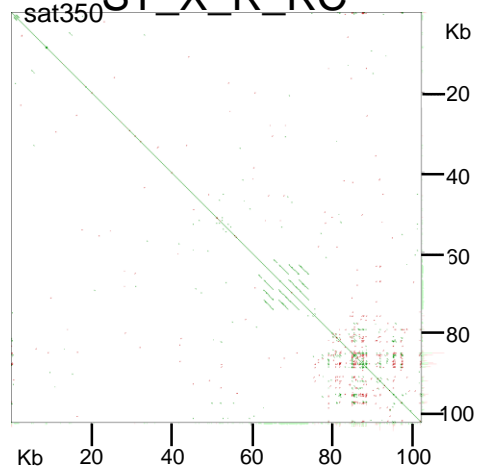

ST\_XI\_L

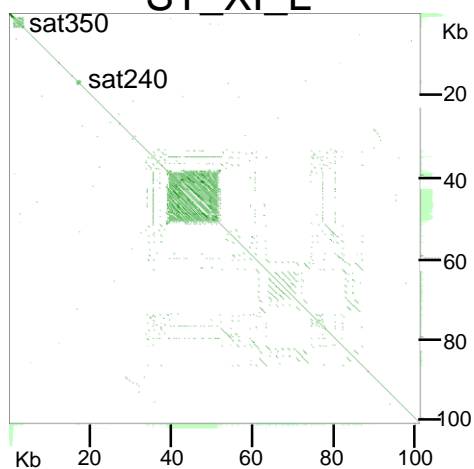

ST\_XI\_R\_RC

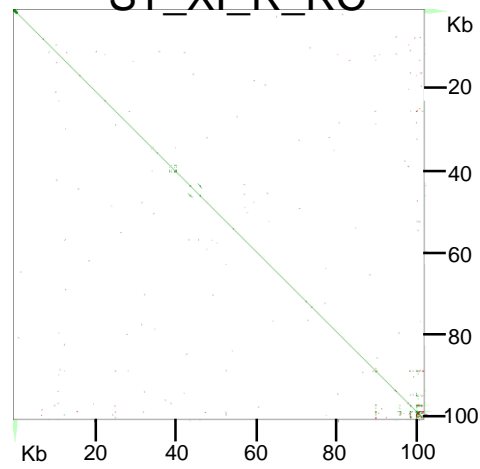

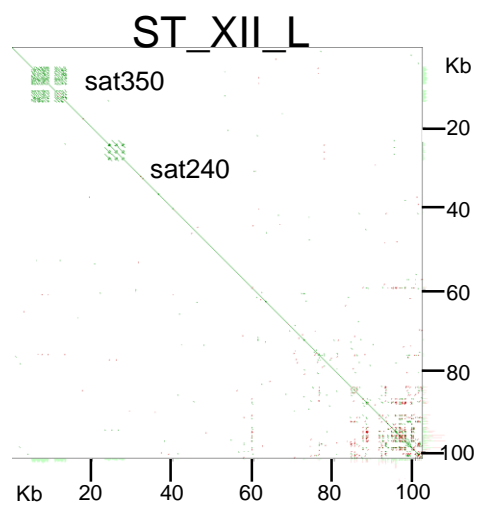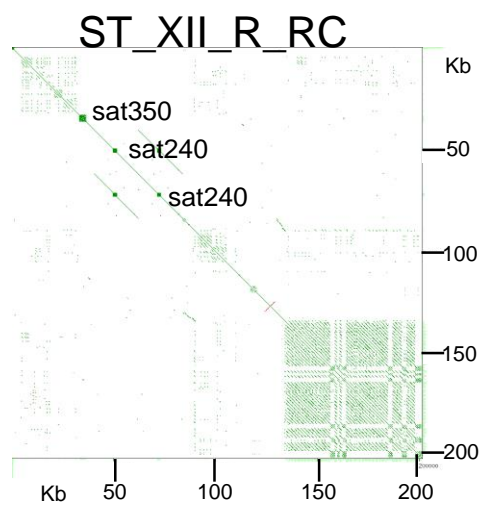

Figure S2

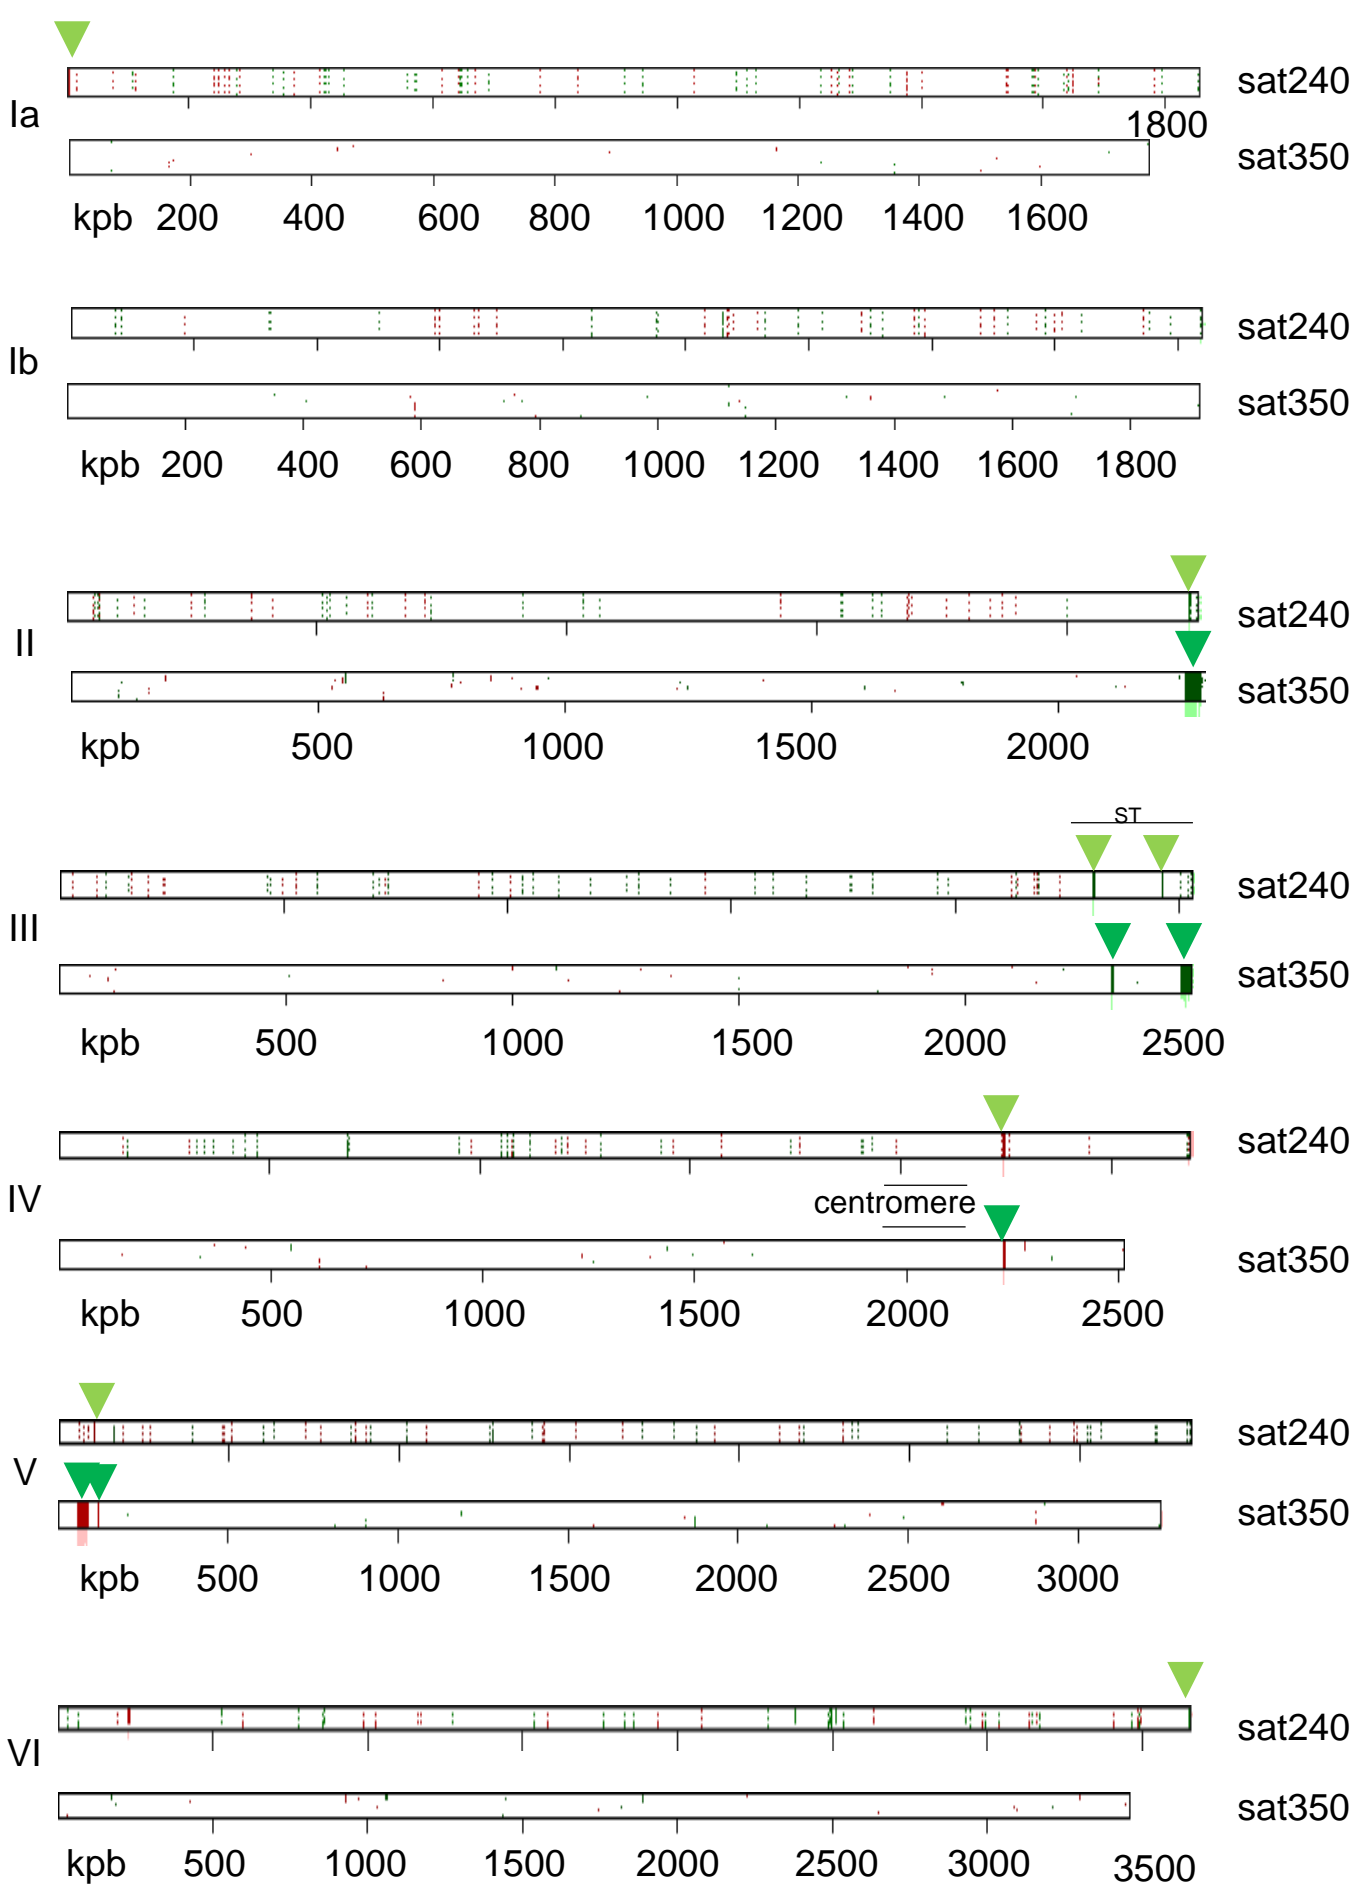

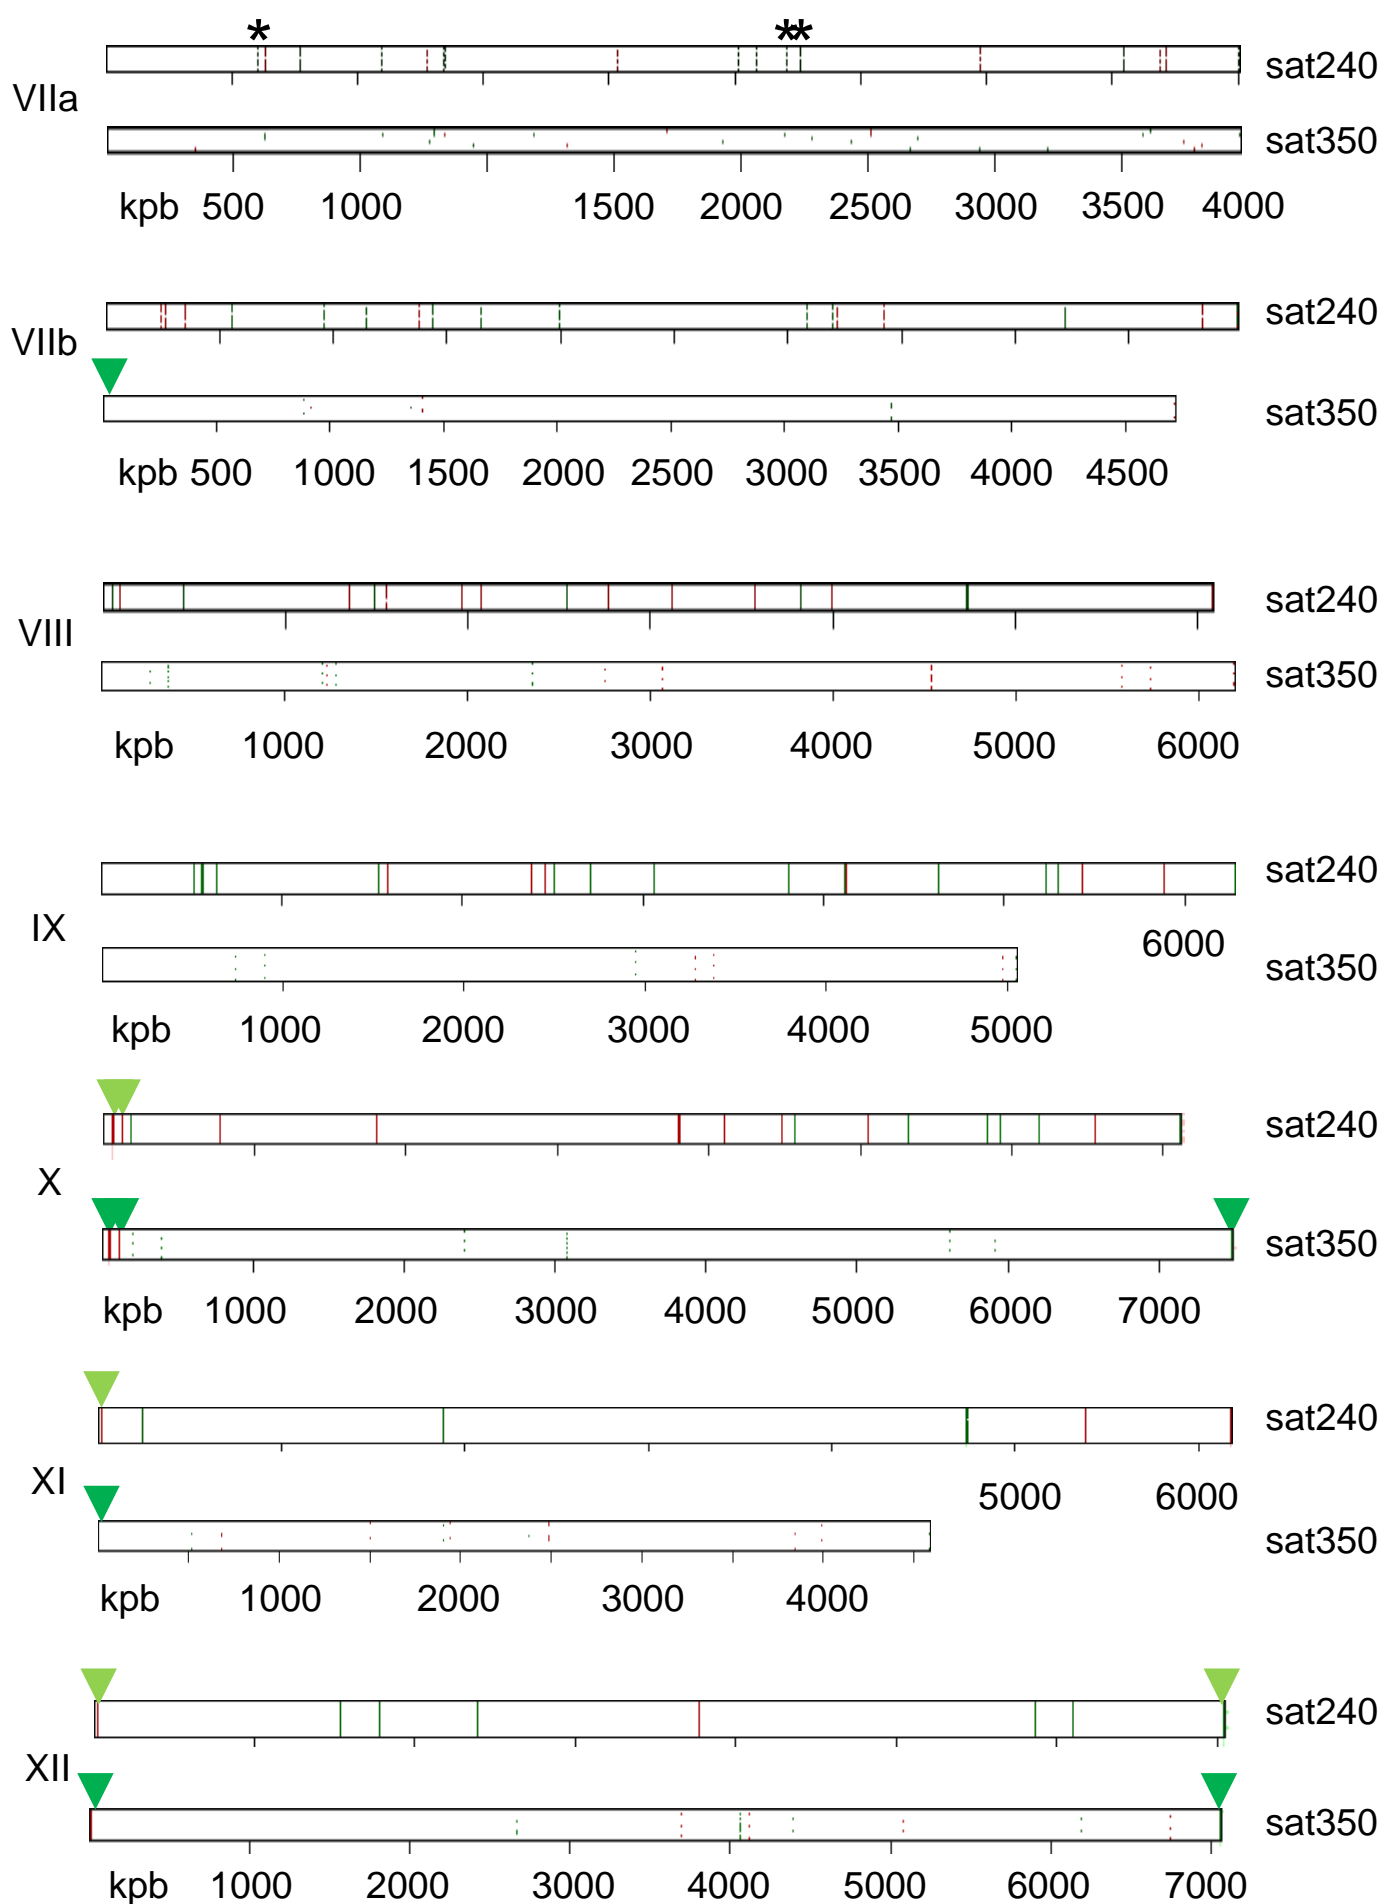

Figure S3



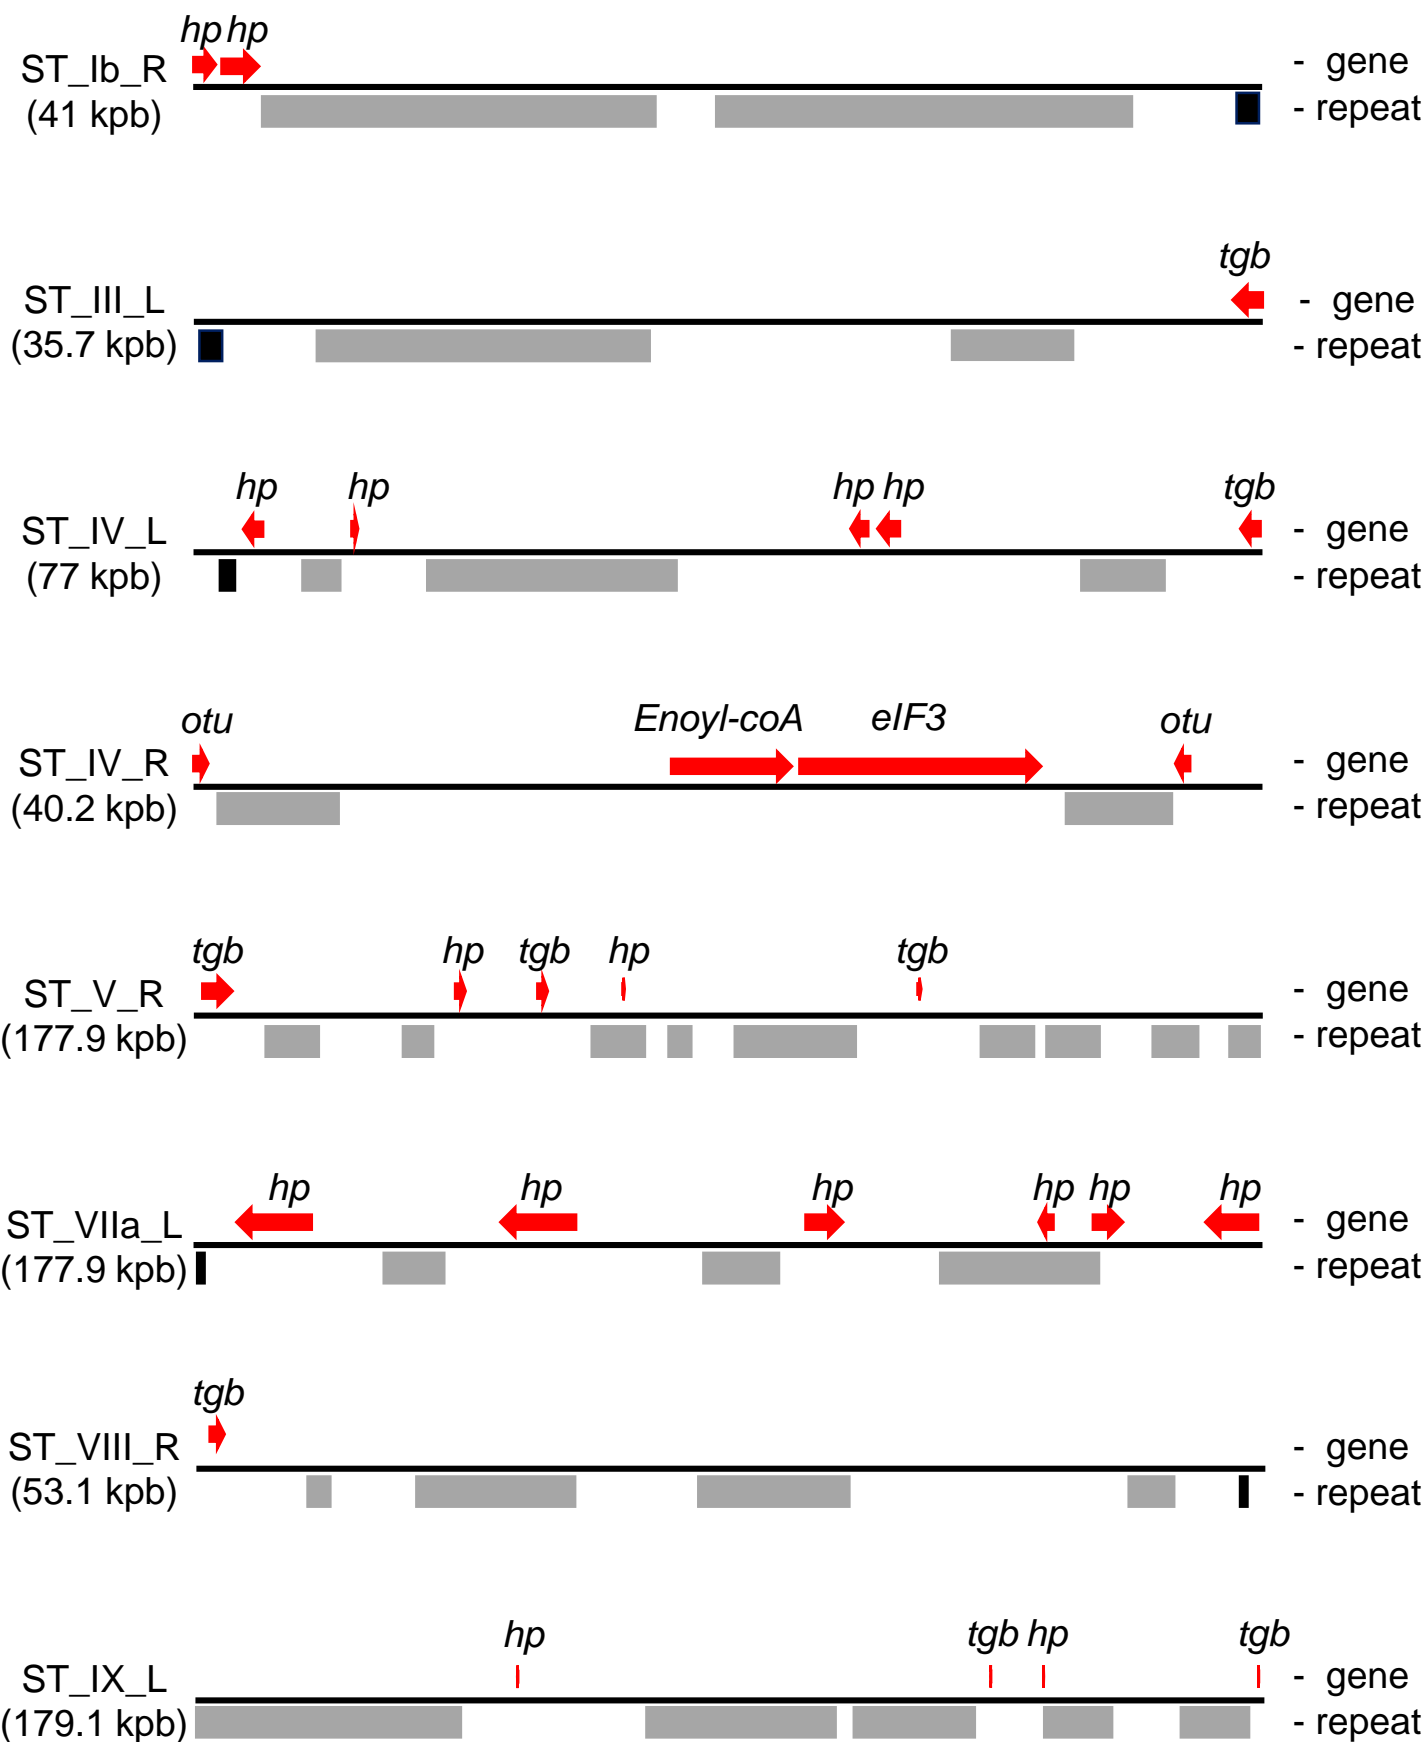

Figure S4
